# Supplementary figures and images for: Dietary Fructose Intake and Hippocampal Structure and Connectivity during Childhood
Source: MDPI journal article supplement (doi:10.3390/nu12040909), 2020-03-26

## Unadjusted Model

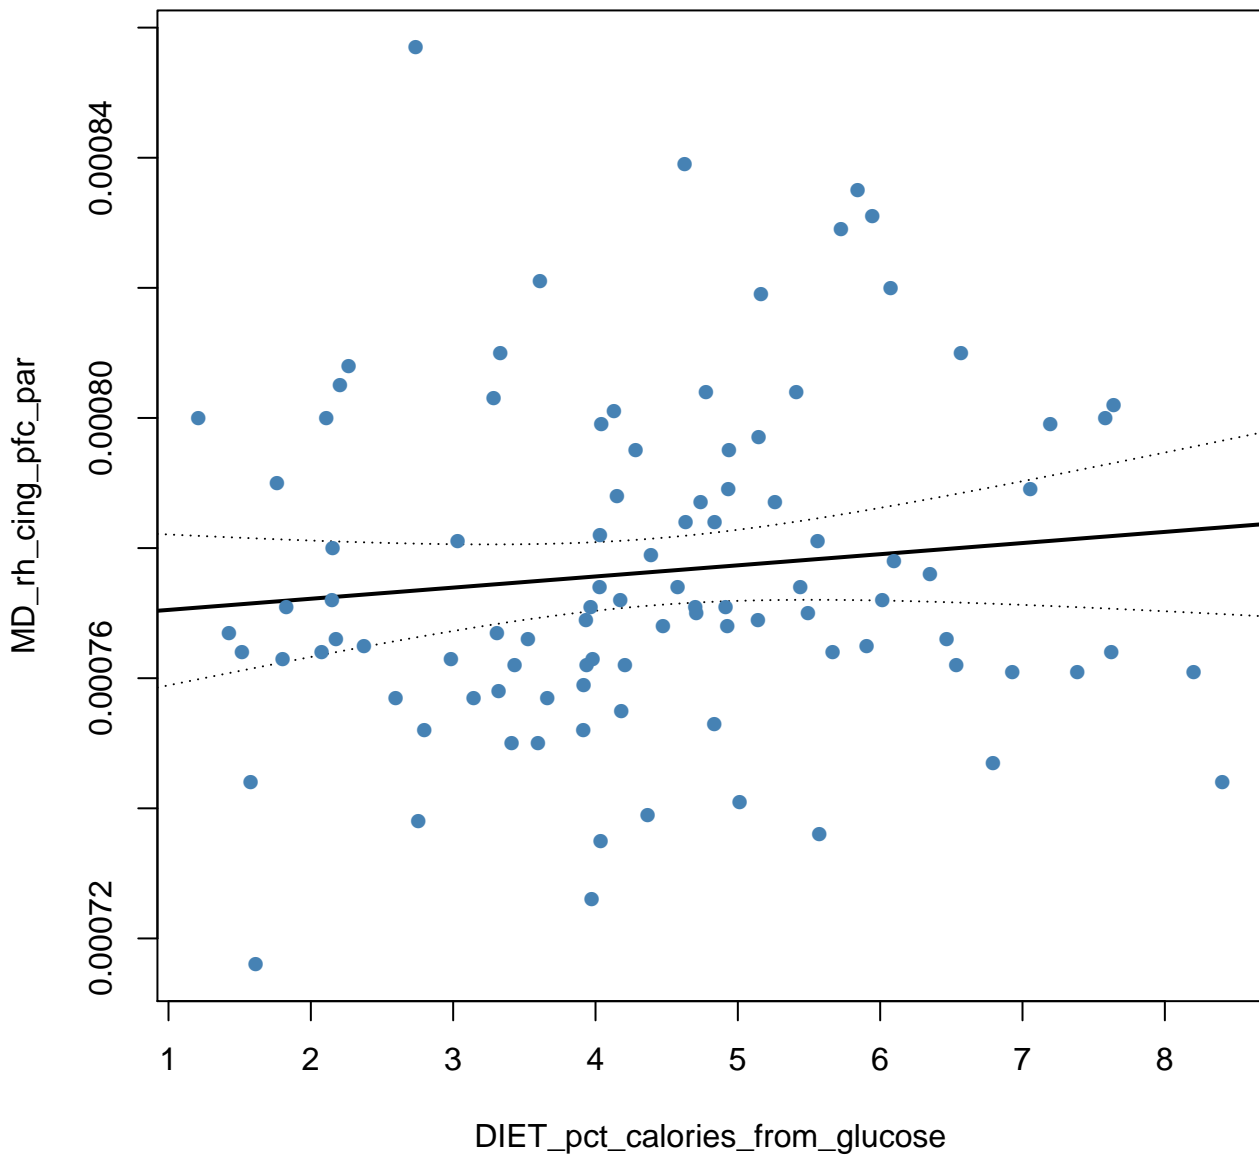

Supplement: s1 [file s1]

## Unadjusted Model

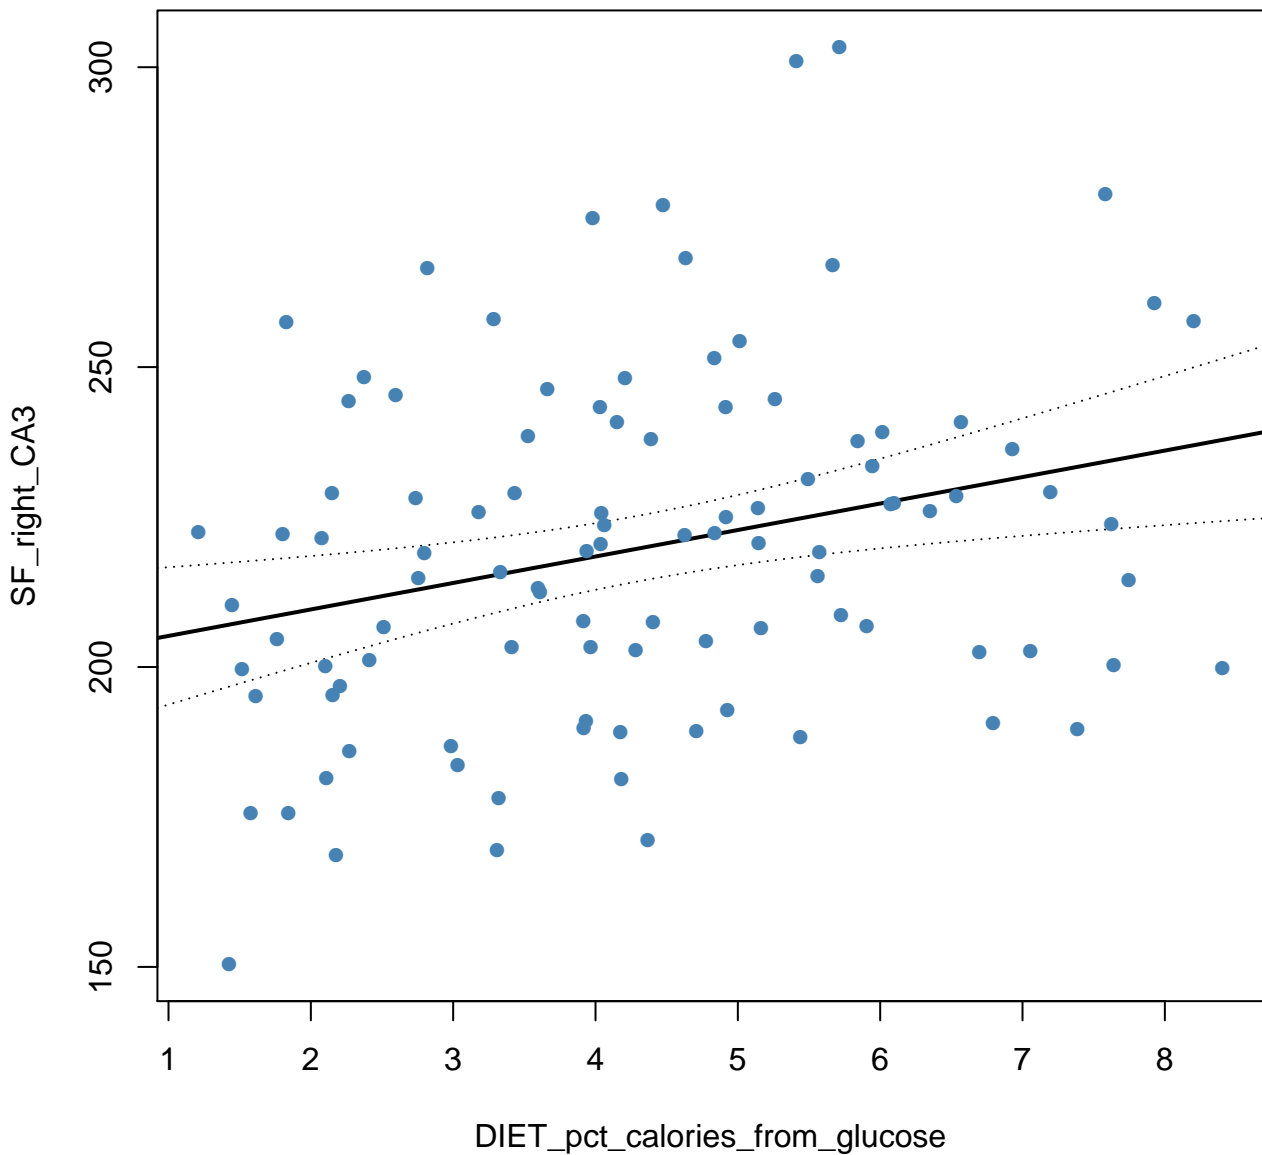

Supplement: s1 [file s1]

## Unadjusted Model

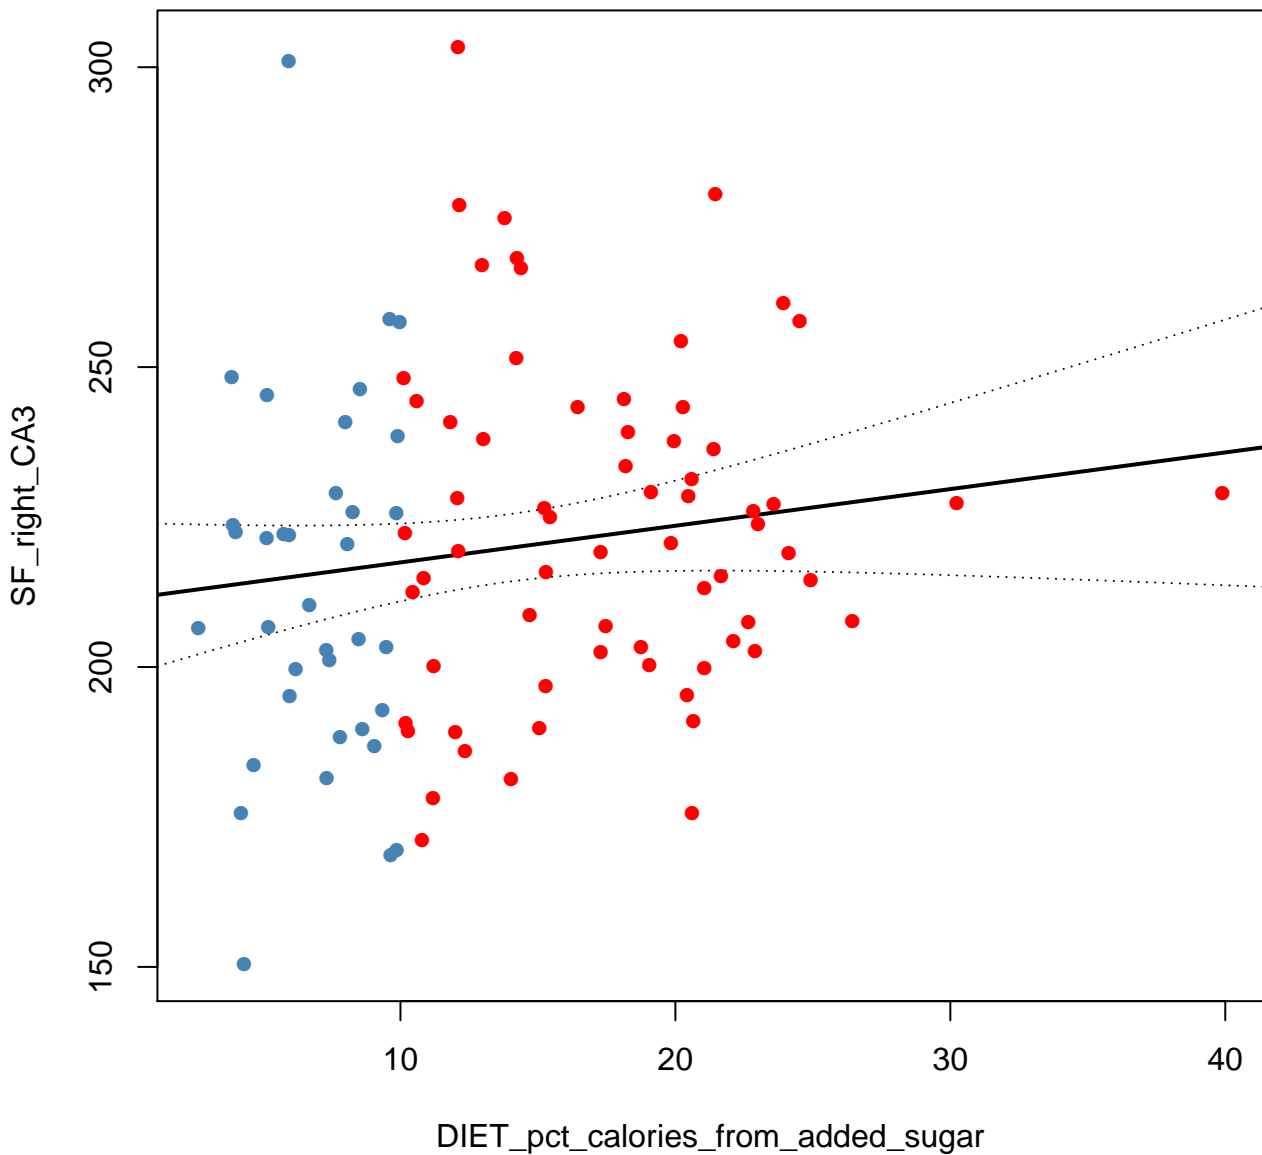

Supplement: s1 [file s1]

## Unadjusted Model

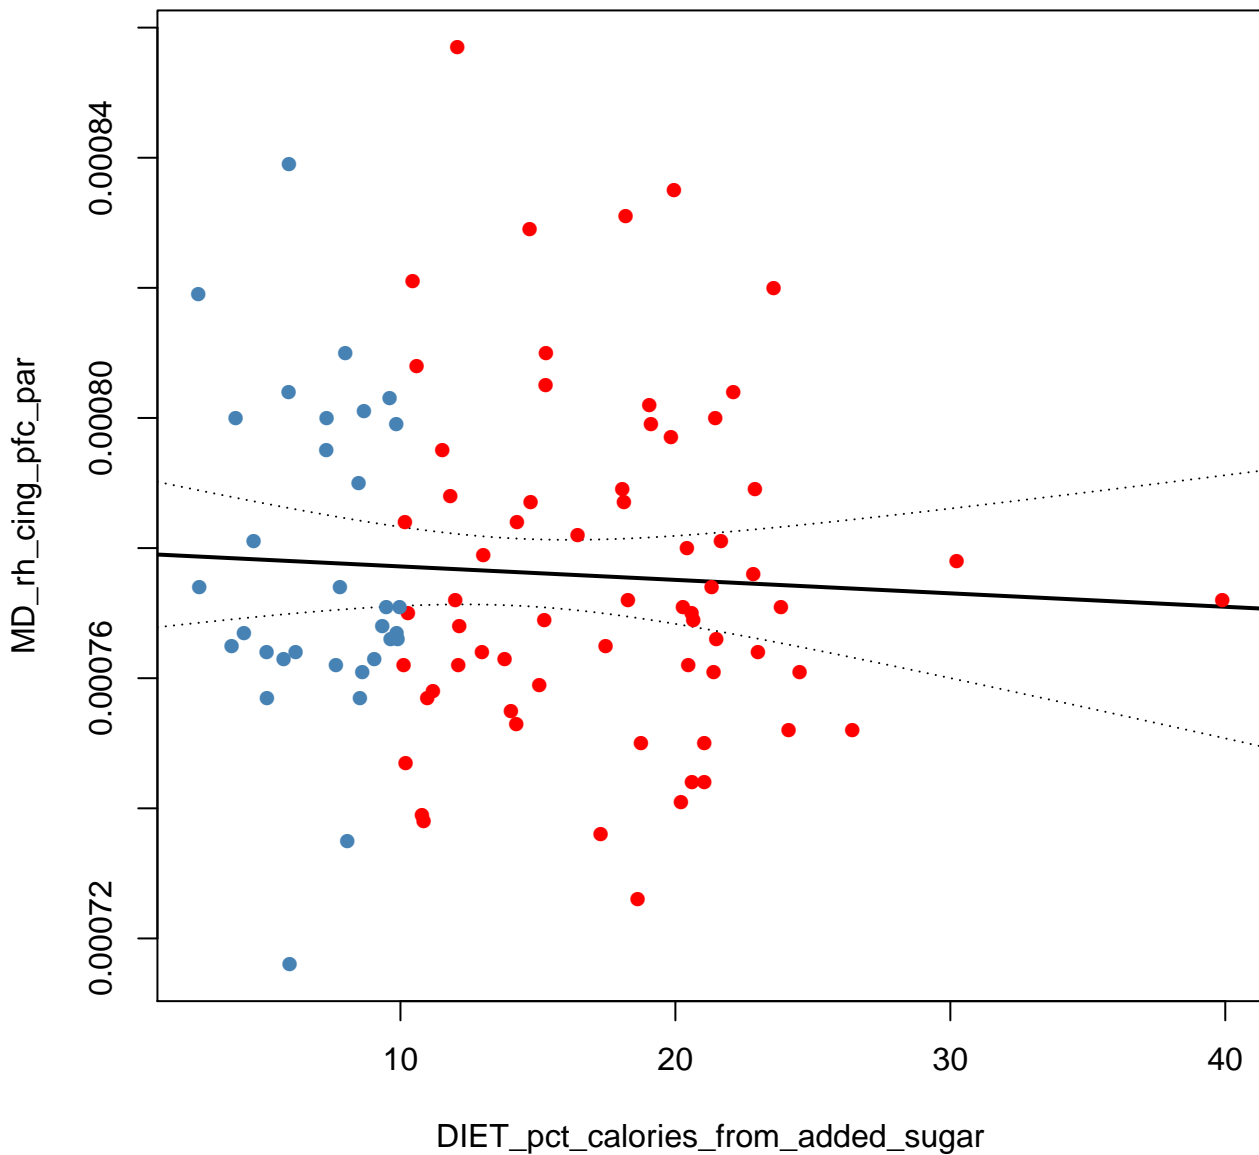

Supplement: s1 [file s1]
